# Supplementary material
Source: publisher figshare collection journal article supplement (https://sage.figshare.com/ndownloader/files/22011501)
Supplement: Supplementary file 1 [file 22011501]

**Supplementary Table 1.** M0 patients with disease relapse and M1 patients.

|  | **1**  **M1**  **Only palliative chemotherapy  No. (%)** | **2**  **M1**  **Pre-operative chemotherapy and conversion surgery   No. (%)** | **3**  **M1**  **Surgery for primary tumor and palliative chemotherapy  No. (%)** | **4**  **M1**  **Only surgery for primary tumor  No. (%)** | **5**  **M1**  **Only BSC  No. (%)** | **6**  **M0**  **GC resection and palliative chemotherapy at relapse**  **No. (%)** | **7**  **M0**  **GC resection and only BSC at relapse**  **No. (%)** |
| --- | --- | --- | --- | --- | --- | --- | --- |
| **Overall no. of patients** | 53 | 9 | 22 | 42 | 104 | 48 | 70 |
| **Gender** |  |  |  |  |  |  |  |
| Male | 29 (54.7) | 7 (77.8) | 10 (45.5) | 22 (52.4) | 63 (60.6) | 30 (62.5) | 42 (60.0) |
| Female | 24 (45.3) | 2 (22.2) | 12 (54.5) | 20 (47.6) | 41 (39.4) | 18 (37.5) | 28 (40.0) |
| **Median age, years (range)** | 63 (16-79) | 64 (25-66) | 66 (41-77) | 78 (33-89) | 79 (49-94) | 66 (35-78) | 77 (38-87) |
| **Period of diagnosis** |  |  |  |  |  |  |  |
| 2000-2004 | 12 (22.6) | 2 (22.2) | 10 (45.5) | 31 (73.8) | 50 (48.1) | 22 (45.8) | 40 (57.1) |
| 2005-2009 | 41 (77.4) | 7 (77.8) | 12 (54.5) | 11 (26.2) | 54 (51.9) | 26 (54.2) | 30 (42.9) |
| **Presence of comorbidities** | 18 (34.0) | 2 (22.2) | 8 (36.4) | 25 (59.5) | 69 (66.6) | 17 (35.4) | 40 (57.1) |
| **Primary site of gastric cancer** |  |  |  |  |  |  |  |
| Upper third | 20 (37.7) | 2 (22.2) | 4 (18.2) | 5 (11.9) | 20 (19.2) | 9 (18.8) | 10 (14.3) |
| Middle third | 14 (26.4) | 2 (22.2) | 8 (36.4) | 13 (31.0) | 43 (41.3) | 15 (31.3) | 25 (35.7) |
| Lower third | 15 (28.3) | 2 (22.2) | 6 (27.3) | 17 (40.5) | 25 (24.0) | 17 (35.4) | 26 (37.1) |
| Linitis plastica | 2 (3.8) | 3 (33.3) | 1 (4.5) | 0 (0.0) | 5 (4.8) | 1 (2.1) | 0 (0.0) |
| Multiple sites | 1 (1.9) | 0 (0.0) | 0 (0.0) | 1 (2.4) | 2 (1.9) | 2 (4.2) | 3 (4.3) |
| Anastomosis | 0 (0.0) | 0 (0.0) | 0 (0.0) | 2 (4.8) | 4 (3.8) | 2 (4.2) | 3 (4.3) |
| Not specified | 1 (1.9) | 0 (0.0) | 3 (13.6) | 4 (9.5) | 5 (4.8) | 2 (4.2) | 3 (4.3) |
| **Histotype** |  |  |  |  |  |  |  |
| Diffuse | 3 (5.7) | 2 (22.2) | 6 (27.3) | 4 (9.5) | 5 (4.8) | 9 (18.8) | 9 (12.9) |
| Intestinal | 14 (26.4) | 3 (33.3) | 9 (40.9) | 23 (54.8) | 30 (28.9) | 27 (56.3) | 39 (55.7) |
| Mixed | 0 (0.0) | 1(11.2) | 3 (13.6) | 2 (4.8) | 0 (0.0) | 2 (4.2) | 4 (5.7) |
| Unclassified | 36 (67.9) | 3 (33.3) | 4 (18.2) | 13 (31.0) | 69 (66.3) | 10 (20.8) | 18 (25.7) |
| **Sites of metastatic disease** |  |  |  |  |  |  |  |
| Peritoneum | 25 (47.2) | 6 (66.7) | 12 (52.2) | 18 (42.8) | 40 (38.5) | 17 (35.4) | 27 (38.0) |
| Liver | 16 (30.2) | 1 (11.1) | 4 (17.4) | 13 (30.9) | 49 (47.1) | 13 (27.1) | 25 (35.2) |
| Lymph nodes | 19 (35.9) | 1 (11.1) | 6 (26.1) | 7 (16.8) | 29 (27.9) | 18 (37.5) | 14 (21.1) |
| Other (lung, bone) | 12 (22.6) | 1 (11.1) | 1 (4.5) | 4 (9.5) | 12 (11.5) | 0 (0.0) | 10 (14.1) |
| **No. of metastatic sites** |  |  |  |  |  |  |  |
| 1 | 53 (100.0) | 8 (88.9) | 22 (31.4) | 42 (100.0) | 104 (100.0) | 0 (0.0) | 0 (0.0) |
| 2 | 0 (0.0) | 1 (11.1) | 0 (0.0) | 0 (0.0) | 0 (0.0) | 33 (68.8) | 52 (74.3) |
| ≥ 3 | 0 (0.0) | 0 (0.0) | 0 (0.0) | 0 (0.0) | 0 (0.0) | 15 (31.2) | 18 (25.7) |
| **First-line chemotherapy** | 53 (100.0) | 9 (100.0) | 22 (100.0) | - | - | 48 (100.0) | - |
| **Second-line chemotherapy** | 23 (43.4) | 4 (44.4) | 11 (50.0) | - | - | 11 (22.9) | - |

M0, patients with stage 0-IIIC gastric cancer at diagnosis; M1, patients with metastatic disease at diagnosis; BSC, best supportive care.
